# Supplementary material
Source: publisher figshare collection journal article supplement (https://springernature.figshare.com/ndownloader/files/14835968)

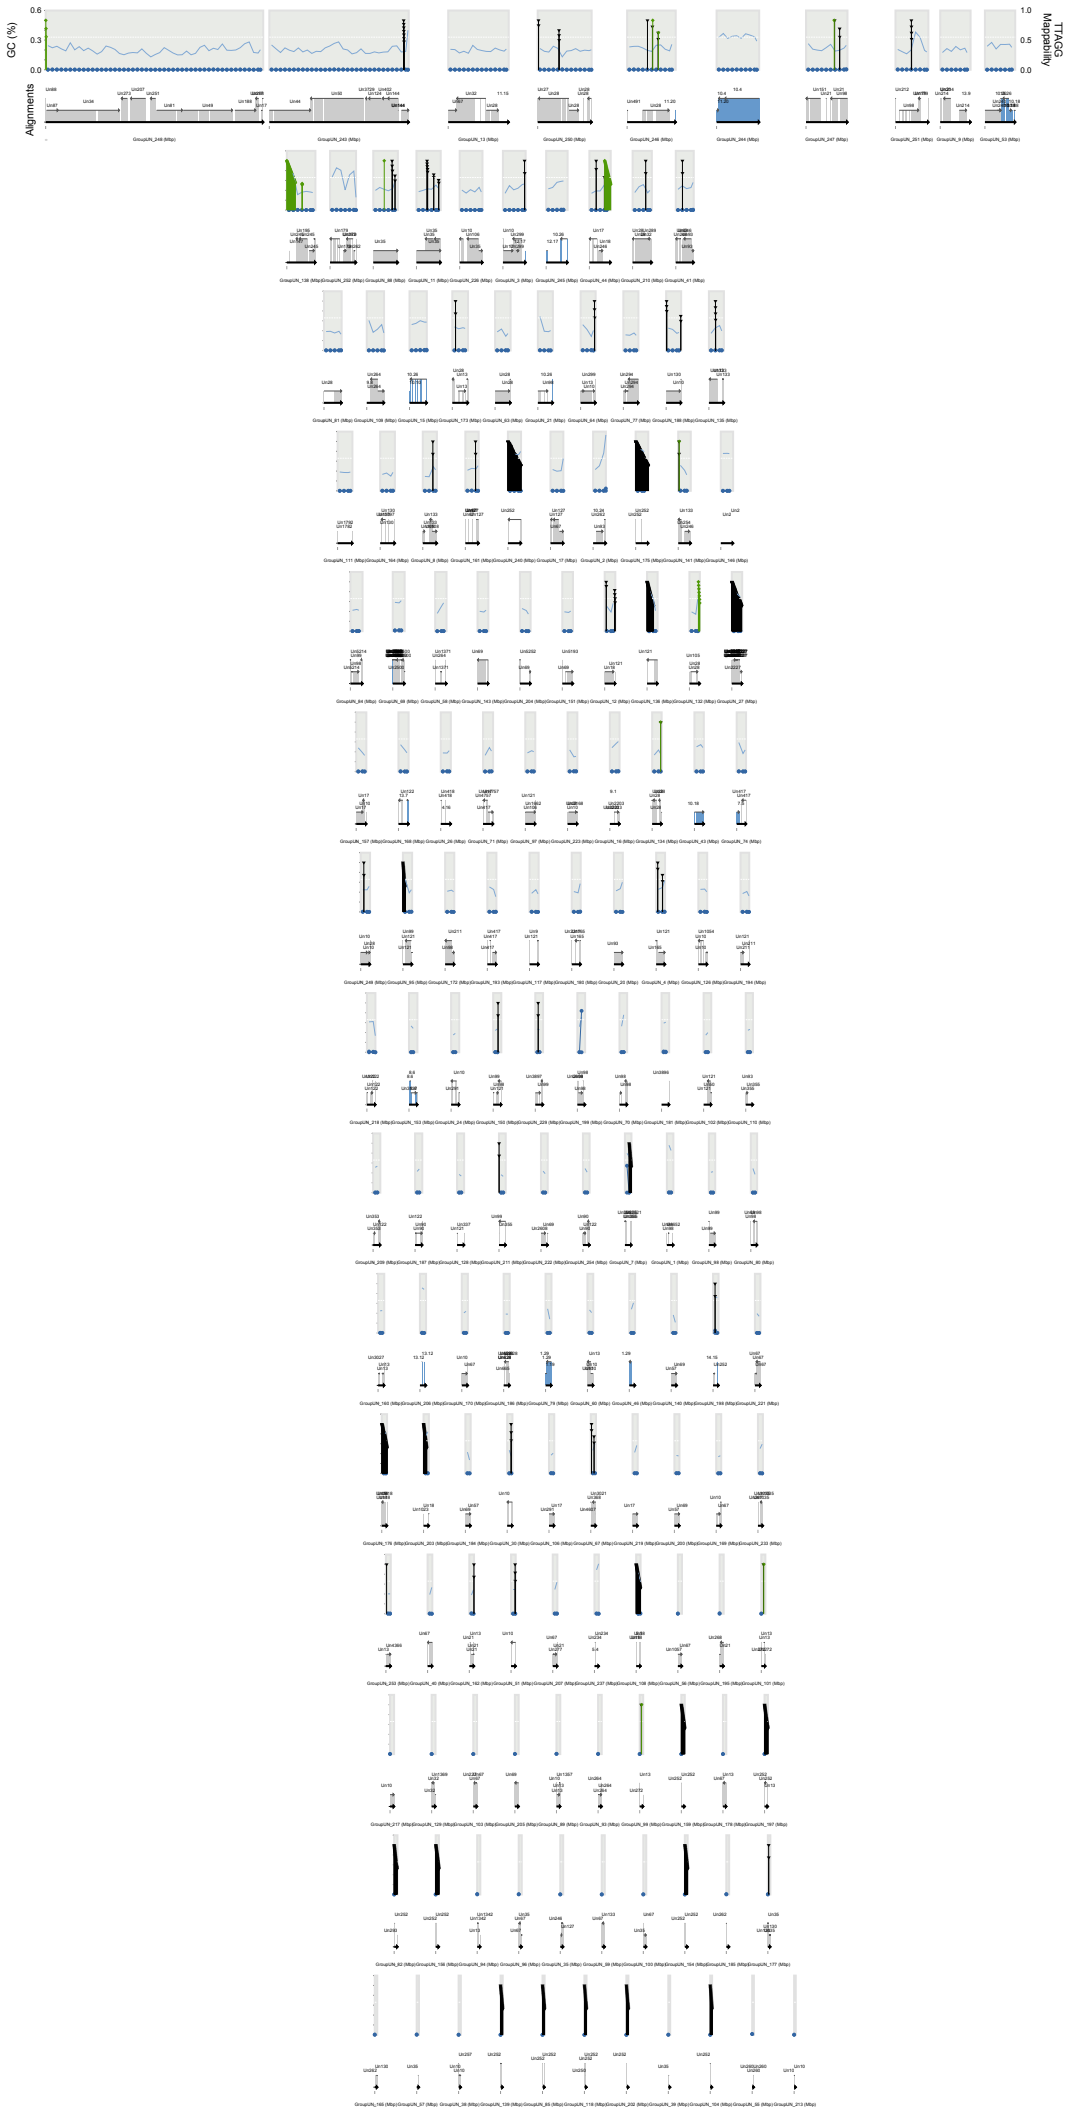

Supplement: Supplementary file 1 [file 14835968]

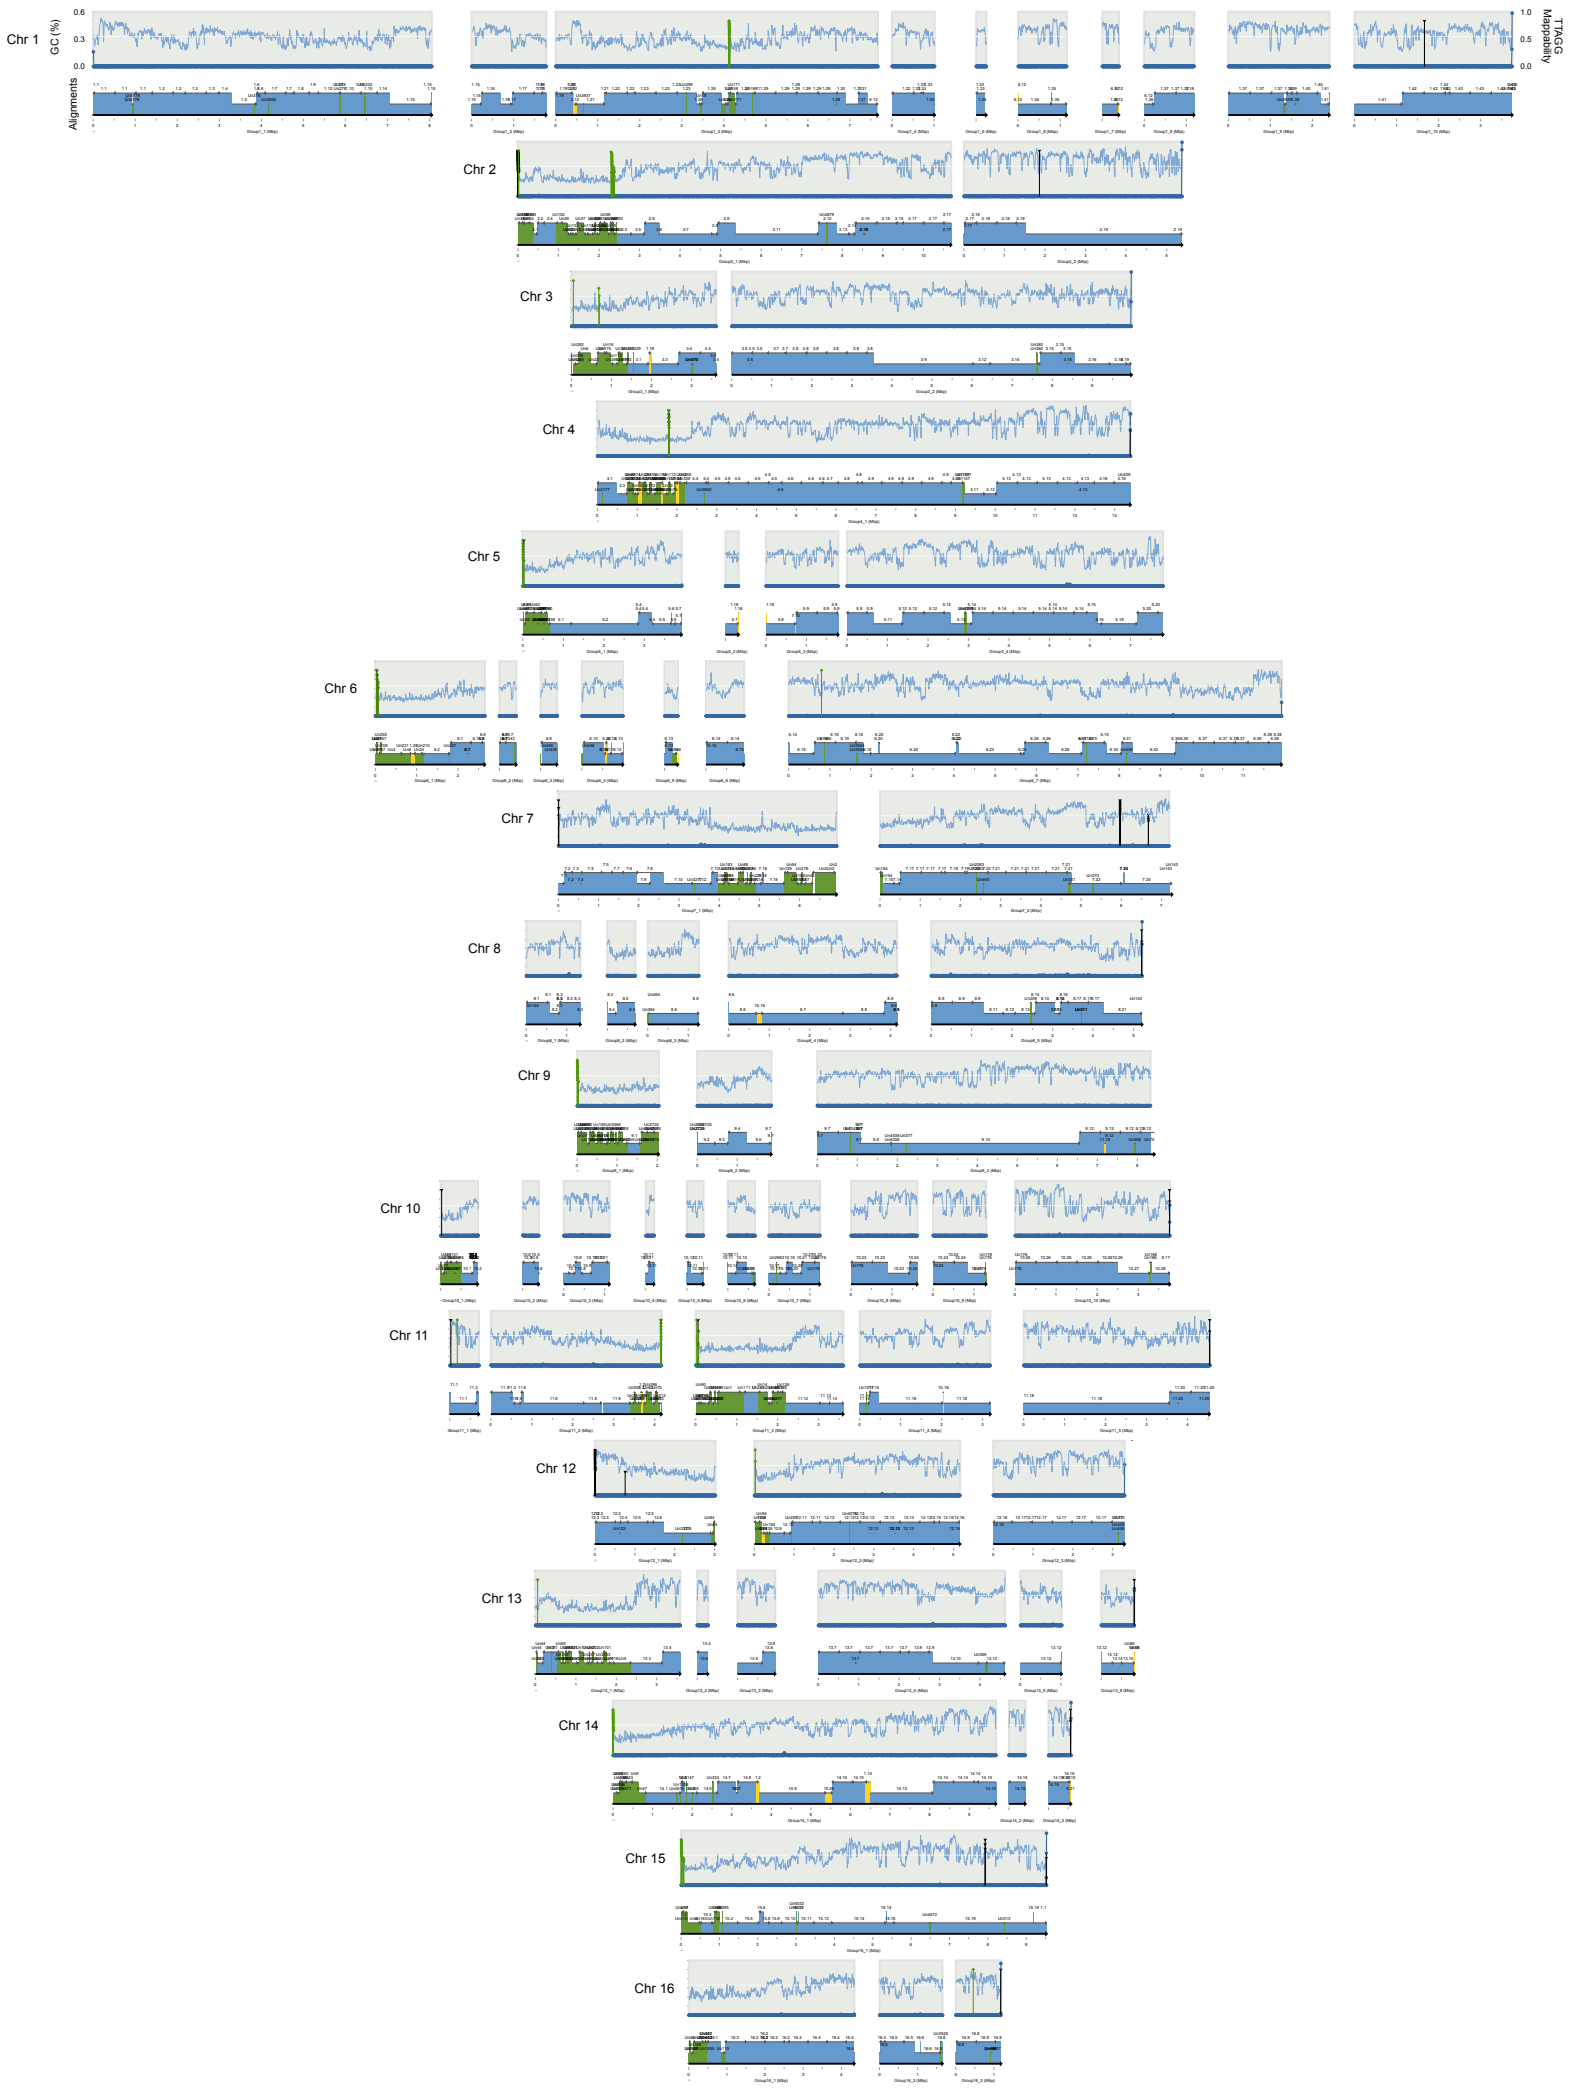

Supplement: Supplementary file 2 [file 14835968]
